# Supplementary material for: Connecting carbon nanotubes to polyoxometalate clusters for engineering high-performance anode materials
Source: Royal Society of Chemistry journal article supplement (doi:10.1039/c4cp03202k), 2014-01-01
Supplement: c4cp03202k1.pdf [file c4cp03202k1.pdf]

Supporting information:

## Connecting Carbon Nanotubes to Polyoxometalate Clusters for Engineering High-Performance Anode Materials\*\*

Wei Chen, Lujiang Huang, Jun Hu, Feifei Jia and Yu-Fei Song\*

*State Key Laboratory of Chemical Resource Engineering, Beijing University of Chemical Technology, 100029  
Beijing, China.*

**Experimental Section.** All reagents were obtained from Alfa Aesar Company and used as received unless otherwise noted. The CNTs were purchased from *Chengdu Organic Chemistry Co. LTD, Chinese Academy of Science*. The detailed information of the CNTs are as follows: Purity >99.9wt%, ID: 5-10 nm, OD: 20-30 nm, Length: 10-30  $\mu\text{m}$ , SSA: >110  $\text{m}^2/\text{g}$ , ASH: <1.5 wt%, Bulk density: 0.28  $\text{g}/\text{cm}^3$ , True density:  $\sim 2.1 \text{ g}/\text{cm}^3$ , EC: > 100s/cm, Making method: CVD, Color: Black.

**Measurements.** FT-IR spectroscopy was measured using KBr pellets and recorded on a NICOLET 6700 (Thermo) instrument.  $^1\text{H}$ -NMR,  $^{13}\text{C}$ -NMR spectra were recorded on a Bruker AV400 NMR spectrometer at room temperature (298K), and the chemical shifts were given relative to TMS as the internal reference. C, H, N elemental analysis was performed on a Vario EL cube from Elemental Analysis system GmbH. Electrospray ionization mass spectrometry (ESI-MS) was obtained on Xevo G2 Q-TOF. Scanning electron microscopy (SEM) images and energy dispersive X-ray (EDX) analytical data were obtained using a Zeiss Supra 55 SEM equipped with an EDX detector. High resolution TEM (HRTEM) was conducted on JEOL JEM-2100 under an accelerating voltage of 400 kV. Thermogravimetric (TG) and differential thermal analyses (DTA) were acquired using a TG/DSC 1/1100 SF from METTLER TOLEDO in flowing  $\text{N}_2$  with a heating rate of  $10 \text{ }^\circ\text{C}\cdot\text{min}^{-1}$ . Raman spectra were measured on a Renishaw Raman spectrometer at a laser excitation wavelength of 633 nm. Fluorescence spectra were recorded on a Hitachi F-7000 luminescence spectrometer with a Xe lamp as the excitation source.

**Battery analyses of CNTs-SiW<sub>11</sub>.** The as-prepared CNTs-SiW<sub>11</sub> nanocomposite was used as an anode material for rechargeable lithium-ion batteries. Electrochemical measurements were carried out using coin-type cells. The lithium battery is a coin cell with 2 cm in diameter. For preparing working electrode, a mixture of CNTs-SiW<sub>11</sub>, carbon black, and poly(vinylidene fluoride) (PVDF) at a weight ratio of 30:50:20 was pasted on a Cu foil. The electrode was dried in vacuum. The testing coin cells were assembled in an argon-filled glove box with the working electrode as-fabricated, metallic lithium foil as a counter electrode, and 1 M  $\text{LiPF}_6$  in solution of 1:1 v/v ethylene carbonate (EC)/diethyl carbonate (DEC) as the electrolyte. Galvanostatic charging/discharging measurements were performed in a potential range of 0-3 V vs.  $\text{Li}/\text{Li}^+$  using a LAND-CT2001A test system at room temperature. The cells were assembled in an argon-filled glove box. The specific charge/discharge capacities were calculated based on the whole composite material.

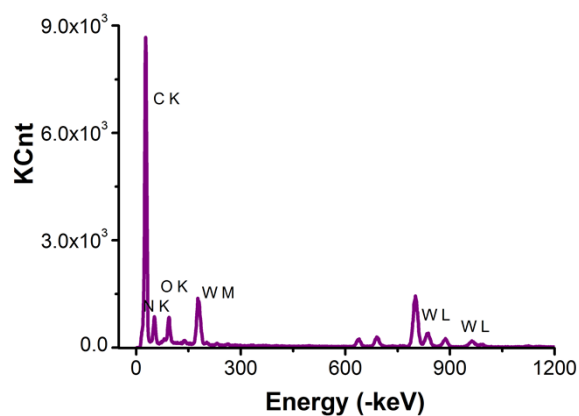

**Figure S1.** EDX spectrum of CNTs-SiW<sub>11</sub> shows the presence of W, C, O etc.

**Table S1.** Electrochemical parameters of electrode materials consisting of POMs or POM-CNTs-based nanocomposites

| Type    | Electrode Type                                                                                         | Current Rate            | Residual reversible capacity (mAhg <sup>-1</sup> ) | Ref.      |
|---------|--------------------------------------------------------------------------------------------------------|-------------------------|----------------------------------------------------|-----------|
| Cathode | K <sub>3</sub> [PMo <sub>12</sub> O <sub>40</sub> ]                                                    | 0.05 mA                 | 160                                                | S1        |
|         | K <sub>4</sub> [SiMo <sub>12</sub> O <sub>40</sub> ]                                                   | 0.05 mA                 | 163                                                | S2        |
|         | K <sub>5.72</sub> H <sub>3.28</sub> [PV <sub>14</sub> O <sub>42</sub> ]                                | 0.05 mA                 | 212                                                | S3        |
|         | TBA <sub>3</sub> [PMo <sub>12</sub> O <sub>40</sub> ]-Graphene                                         | 1.0 mA                  | 140                                                | S4        |
|         | TBA <sub>3</sub> [PMo <sub>12</sub> O <sub>40</sub> ]-SWNT                                             | 1.0 mA                  | 320                                                | S5        |
| Anode   | TBA <sub>2</sub> [Mo <sub>6</sub> O <sub>18</sub> -N-Ph-( <i>o</i> -CH <sub>3</sub> )2- <i>p</i> -SCN] | 50 mA g <sup>-1</sup>   | 876                                                | 24        |
|         | TBA <sub>4</sub> [Py-SiW <sub>11</sub> ]-SWNTs                                                         | 0.5 mA cm <sup>-2</sup> | 580                                                | 7a        |
|         | CNTs-SiW <sub>11</sub>                                                                                 | 0.5 mA cm <sup>-2</sup> | 650                                                | This work |

Note: PANI: polyaniline

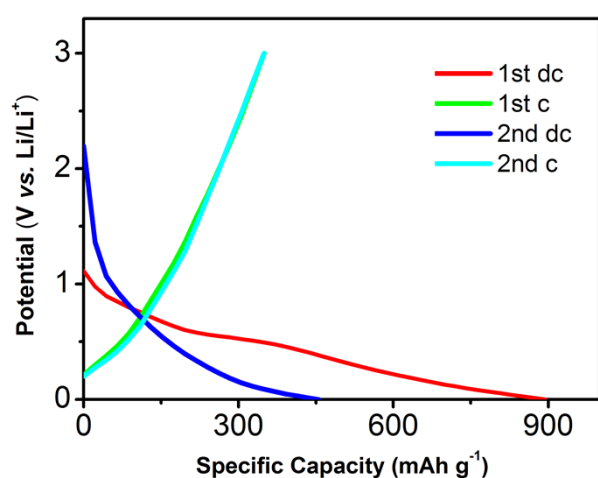

**Figure S2.** The 1st and 2nd charge and discharge curves of the physical mixture of CNTs and SiW<sub>11</sub> ; current density is 0.5 mA cm<sup>-2</sup>.

## References:

- [S1] N. Sonoyama, Y. Suganuma, T. Kume, Z. Quan, *J. Power Sources.*, 2011, 196, 6822–6827.
- [S2] E. Ni, T. Kume, S. Uematsu, Z. Quan, N. Sonoyama, *Electro. Soc. Jap.*, 2014, 82, 14-18.
- [S3] S. Uematsu, Z. Quan, Y. Suganuma, N. Sonoyama, *J. Power Sources.*, 2012, 217, 13-20.
- [S4] K. Kume, N. Kawasaki, H. Wang, T. Yamada, H. Yoshikawa, K. Awaga, *J. Mater. Chem. A.*, 2014, 2, 3801-3807.
- [S5] (a) N. Kawasaki, H. Wang, R. Nakanishi, S. Hamanaka, R. Kitaura<sup>1</sup>, H. Shinohara, T. Yokoyama, H. Yoshikawa, K. Awaga, *Angew. Chem. Int. Ed.*, 2011, 50, 3471-3474; (b) H. Wang, N. Kawasaki, T. Yokoyama, H. Yoshikawa, K. Awaga, *Dalton Trans.*, 2012, 41, 9863–9866.
- [S6] R. Naumaan, N. Khan, N. Mahmood, C. Lv, G. Simaa, J. Zhanga, J. Haoa, Y. Hou, Y. Wei, *RSC Adv.*, 2014, 4, 7374-7379.
